# Supplementary material for: A supercritical removal method: the rapid elimination of impurities in polymethyl-methacrylate at near room temperature and a mechanism investigation of insulating property improvements
Source: Royal Society of Chemistry journal article supplement (doi:10.1039/d0tc03975f), 2020-01-01
Supplement: d0tc03975f1.pdf [file d0tc03975f1.pdf]

## Supporting Information

### Supercritical Removal Method: Rapid Elimination of Impurities in Polymethyl-methacrylate at Near Room Temperature and Mechanism Investigation of Insulating Property Improvement

Kang Qi,<sup>a</sup> Lei Li,<sup>a,b</sup> Kuan-Chang Chang,<sup>\*a</sup> Xinnan Lin,<sup>\*a</sup> Heng-Jui Liu,<sup>b</sup> Ying-Chih Lai,<sup>b</sup> Haiting Zheng,<sup>c</sup> Guangyan Huang,<sup>c</sup> Tzu-Peng Kuo<sup>d</sup>

Carbon oxide (CO<sub>2</sub>) is the best suitable and environmentally-friendly supercritical solvent and it enters supercritical state under the minimum critical pressure 1072 psi and minimum temperature 31 °C. The operating pressure was set at 1500 psi, a bit higher than the critical pressure (1072 psi) in order to guarantee the CO<sub>2</sub> in supercritical phase and simultaneously achieve the impurity elimination at most accessible and energy-saving condition. For better illustrating the influence of pressure, temperature and time, several contrast experiments were carried out.

When applied higher pressure or higher temperature, the structure will foam or swell in certain degree. Comparing these experiment conditions, we find that the best suitable experimental parameters are 1500 psi, 40 °C and 15 min in Table S1.

Table S1. Phenomena under different supercritical treatment conditions

| Conditions | Pressure (psi) | Temperature (°C) | Time (min) | Phenomena                     |
|------------|----------------|------------------|------------|-------------------------------|
| 1          | 1500           | 40               | 15         | Leakage reduced by 11.3 times |
| 2          | 2000           | 40               | 15         | Foaming                       |
| 3          | 1500           | 80               | 15         | Foaming and Swelling          |
| 4          | 1500           | 60               | 15         | Leakage reduced by 4.7 times  |
| 5          | 1500           | 40               | 30         | Leakage reduced by 10.8 times |
